# Supplementary material
Source: publisher figshare collection journal article supplement (https://acs.figshare.com/ndownloader/files/3853309)
Supplement: Supplementary file 1 [file 3853309]

## Selective Biotemplated Synthesis of TiO<sub>2</sub> Inside a Protein Cage

**Authors:** Gregory J. Bedwell<sup>1</sup>, Ziyu Zhou<sup>2</sup>, Masaki Uchida<sup>3,4</sup>, Trevor Douglas<sup>3,4</sup>, Arunava Gupta<sup>2</sup>, and Peter E. Prevelige, Jr.<sup>1\*</sup>

### Affiliations:

1. Department of Microbiology, University of Alabama at Birmingham, Birmingham, Alabama 35294, United States
2. Center for Materials for Information Technology, University of Alabama, Tuscaloosa, Alabama 35487, United States
3. Department of Chemistry, Indiana University, Bloomington, Indiana 47405, United States

### Supplementary Information

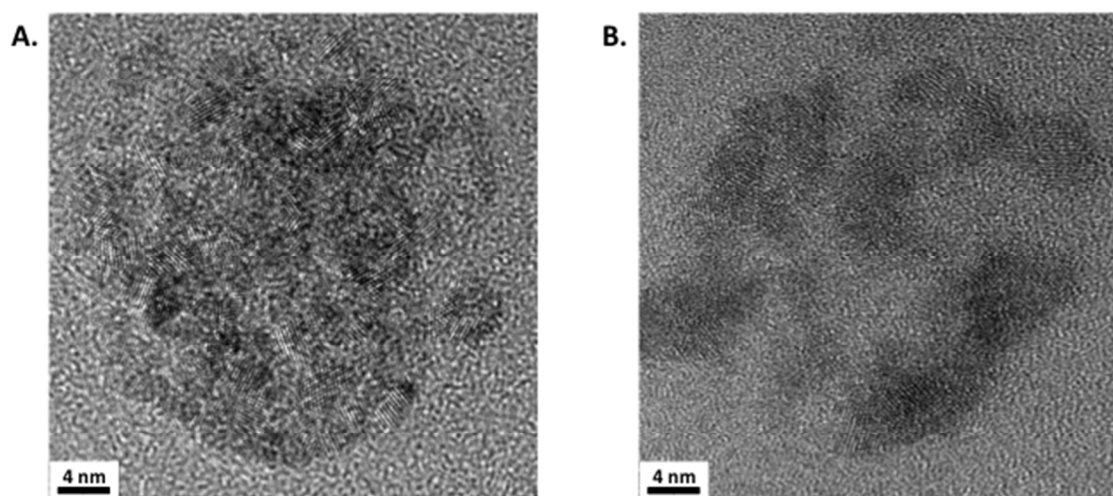

**Figure S1.** Whole particle images of the particles shown in Figures 2C and 2D. Shells containing the T1 construct (**A**) and the T2 construct (**B**) were synthesized in phosphate buffer and imaged by HRTEM. The particles clearly show poly-crystallinity, consistent with the presence of multiple nucleation sites.
